# Supplementary material for: Identification of KIF18B as a Hub Candidate Gene in the Metastasis of Clear Cell Renal Cell Carcinoma by Weighted Gene Co-expression Network Analysis
Source: Front Genet. 2020 Aug 20;11:905. doi: 10.3389/fgene.2020.00905 (PMC7468490; doi:10.3389/fgene.2020.00905)
Supplement: Supplementary file 3 [file Table_3.XLSX]

## Sheet: GO.BP of ccRCC-related module
GO.BP terms of top ccRCC-related module
Go Term	Gene Count	pvalue	BH-corrected pvalue	gene symbol
mitotic nuclear division	50	1.11251e-23	4.81051e-20	ANLN/EDN1/UBE2C/KIF2A/PRC1/TPX2/CCNB1/KIF11/BUB1B/RACGAP1/NUF2/NDC80/UBE2S/ZWINT/TTK/PTTG1/CDC20/NCAPG/DLGAP5/KIF4A/KIF14/KIF18B/IL1B/TRIP13/NUSAP1/MAD2L1/TUBG1/TACC3/CENPE/KNTC1/CCDC8/BIRC5/NEK2/MKI67/AURKA/PSRC1/SPDL1/MAD1L1/KIF18A/MAP9/SMC4/KIF2C/BORA/ESPL1/PLK1/CDCA8/FBXO5/KIF23/CDC6/CDCA5
sister chromatid segregation	46	1.5972e-22	3.45314e-19	UBE2C/KIF2A/PRC1/CCNB1/BUB1B/CENPK/RACGAP1/NUF2/NDC80/ZWINT/TTK/PTTG1/TOP2A/CDC20/CENPA/NCAPG/DLGAP5/KIF4A/KIF14/KIF18B/TRIP13/NUSAP1/MAD2L1/TUBG1/TACC3/CENPE/KNTC1/BIRC5/NEK2/ZWILCH/CENPH/PSRC1/SPDL1/MAD1L1/KIF18A/SMC4/KIF2C/ESPL1/RMI2/PLK1/CDCA8/KIF23/CDC6/CDCA5/FEN1/CENPM
nuclear division	59	8.45691e-22	1.21892e-18	ANLN/CKS2/EDN1/RAD54B/UBE2C/KIF2A/PRC1/TPX2/CCNB1/KIF11/BUB1B/RACGAP1/NUF2/NDC80/UBE2S/ZWINT/TTK/PTTG1/TOP2A/C11orf80/CDC20/NCAPG/DLGAP5/KIF4A/KIF14/KIF18B/IL1B/TRIP13/NUSAP1/CCNA1/MYBL1/MAD2L1/TUBG1/TACC3/MASTL/CENPE/KNTC1/CCDC8/BIRC5/NEK2/MKI67/AURKA/PSRC1/SPDL1/MAD1L1/KIF18A/CDC25B/MAP9/SMC4/KIF2C/BORA/ESPL1/ASPM/PLK1/CDCA8/FBXO5/KIF23/CDC6/CDCA5
chromosome segregation	53	2.74142e-20	2.96348e-17	UBE2C/KIF2A/PRC1/CCNB1/KIF11/BUB1B/CENPK/RACGAP1/NUF2/NDC80/CENPW/ZWINT/TTK/PTTG1/TOP2A/CDC20/CENPA/NCAPG/DLGAP5/KIF4A/KIF14/KIF18B/TRIP13/NUSAP1/FAM83D/MAD2L1/TUBG1/TACC3/CENPE/KNTC1/BIRC5/HJURP/NEK2/ZWILCH/MKI67/CENPH/PSRC1/SPDL1/MAD1L1/KIF18A/OIP5/SMC4/KIF2C/ECT2/ESPL1/RMI2/PLK1/CDCA8/KIF23/CDC6/CDCA5/FEN1/CENPM
mitotic sister chromatid segregation	35	4.61146e-20	3.98799e-17	UBE2C/PRC1/CCNB1/BUB1B/RACGAP1/NUF2/NDC80/ZWINT/TTK/PTTG1/CDC20/NCAPG/DLGAP5/KIF4A/KIF14/KIF18B/TRIP13/NUSAP1/MAD2L1/TUBG1/TACC3/CENPE/NEK2/PSRC1/SPDL1/MAD1L1/KIF18A/SMC4/KIF2C/ESPL1/PLK1/CDCA8/KIF23/CDC6/CDCA5
organelle fission	59	1.74428e-19	1.10963e-16	ANLN/CKS2/EDN1/RAD54B/UBE2C/KIF2A/PRC1/TPX2/CCNB1/KIF11/BUB1B/RACGAP1/NUF2/NDC80/UBE2S/ZWINT/TTK/PTTG1/TOP2A/C11orf80/CDC20/NCAPG/DLGAP5/KIF4A/KIF14/KIF18B/IL1B/TRIP13/NUSAP1/CCNA1/MYBL1/MAD2L1/TUBG1/TACC3/MASTL/CENPE/KNTC1/CCDC8/BIRC5/NEK2/MKI67/AURKA/PSRC1/SPDL1/MAD1L1/KIF18A/CDC25B/MAP9/SMC4/KIF2C/BORA/ESPL1/ASPM/PLK1/CDCA8/FBXO5/KIF23/CDC6/CDCA5
nuclear chromosome segregation	48	1.79634e-19	1.10963e-16	UBE2C/KIF2A/PRC1/CCNB1/BUB1B/CENPK/RACGAP1/NUF2/NDC80/ZWINT/TTK/PTTG1/TOP2A/CDC20/CENPA/NCAPG/DLGAP5/KIF4A/KIF14/KIF18B/TRIP13/NUSAP1/FAM83D/MAD2L1/TUBG1/TACC3/CENPE/KNTC1/BIRC5/NEK2/ZWILCH/CENPH/PSRC1/SPDL1/MAD1L1/KIF18A/SMC4/KIF2C/ECT2/ESPL1/RMI2/PLK1/CDCA8/KIF23/CDC6/CDCA5/FEN1/CENPM
microtubule cytoskeleton organization involved in mitosis	28	2.55267e-15	1.37972e-12	KIF2A/PRC1/TPX2/CCNB1/KIF11/RACGAP1/NUF2/NDC80/TTK/CDC20/CENPA/KIF4A/PAX6/NUSAP1/TUBG1/TACC3/CENPE/BIRC5/NEK2/AURKA/PSRC1/SPDL1/STIL/MAP9/BORA/ESPL1/PLK1/KIF23
regulation of mitotic nuclear division	29	7.30166e-14	3.50804e-11	ANLN/EDN1/UBE2C/CCNB1/KIF11/BUB1B/NDC80/TTK/PTTG1/DLGAP5/IL1B/TRIP13/NUSAP1/MAD2L1/TACC3/CENPE/KNTC1/CCDC8/NEK2/MKI67/AURKA/MAD1L1/MAP9/BORA/ESPL1/PLK1/FBXO5/CDC6/CDCA5
regulation of chromosome segregation	23	1.29068e-13	5.58091e-11	UBE2C/CCNB1/BUB1B/RACGAP1/NDC80/TTK/PTTG1/DLGAP5/TRIP13/MAD2L1/TACC3/CENPE/NEK2/MKI67/MAD1L1/KIF2C/ECT2/ESPL1/RMI2/PLK1/CDC6/CDCA5/FEN1
regulation of nuclear division	30	4.12572e-13	1.62178e-10	ANLN/EDN1/UBE2C/CCNB1/KIF11/BUB1B/NDC80/TTK/PTTG1/CDC20/DLGAP5/IL1B/TRIP13/NUSAP1/MAD2L1/TACC3/CENPE/KNTC1/CCDC8/NEK2/MKI67/AURKA/MAD1L1/MAP9/BORA/ESPL1/PLK1/FBXO5/CDC6/CDCA5
mitotic spindle organization	23	2.01788e-12	7.2711e-10	KIF2A/PRC1/TPX2/CCNB1/KIF11/RACGAP1/NUF2/NDC80/TTK/CDC20/KIF4A/TUBG1/TACC3/CENPE/BIRC5/NEK2/AURKA/PSRC1/STIL/MAP9/BORA/PLK1/KIF23
sister chromatid cohesion	24	1.20193e-11	3.99781e-09	KIF2A/BUB1B/CENPK/NUF2/NDC80/ZWINT/CDC20/CENPA/MAD2L1/CENPE/KNTC1/BIRC5/ZWILCH/CENPH/SPDL1/MAD1L1/KIF18A/KIF2C/ESPL1/PLK1/CDCA8/CDCA5/FEN1/CENPM
regulation of cell cycle phase transition	46	1.40258e-11	4.33195e-09	ANLN/FHL1/UBE2C/TPX2/CCNB1/BUB1B/EZH2/SFN/NDC80/HMMR/TTK/PKIA/DTL/DLGAP5/KIF14/CDC7/TRIP13/FAM83D/MAD2L1/E2F8/TUBG1/CDK1/CENPE/KNTC1/TUBA4A/NEK2/DONSON/AURKA/E2F7/MAD1L1/TOPBP1/PCNA/CDC25B/PSMD14/CDK6/BRCC3/CARM1/ESPL1/NBN/PLK1/BID/CDKN2C/PSMA7/CDC6/CDCA5/UBE2E2
cell cycle checkpoint	31	1.59713e-11	4.60399e-09	CCNB1/BUB1B/FBXO6/SFN/NDC80/ZWINT/TTK/TOP2A/DTL/TRIP13/MAD2L1/NABP1/E2F8/CDK1/KNTC1/DONSON/ZWILCH/AURKA/E2F7/SPDL1/MAD1L1/TOPBP1/PCNA/DNA2/BRCC3/RHNO1/CARM1/NBN/PLK1/ATR/CDC6
regulation of sister chromatid segregation	18	3.55075e-11	9.59589e-09	UBE2C/CCNB1/BUB1B/NDC80/TTK/PTTG1/DLGAP5/TRIP13/MAD2L1/TACC3/CENPE/MAD1L1/ESPL1/RMI2/PLK1/CDC6/CDCA5/FEN1
regulation of mitotic cell cycle phase transition	43	4.4182e-11	1.12378e-08	ANLN/FHL1/UBE2C/TPX2/CCNB1/BUB1B/EZH2/SFN/NDC80/HMMR/TTK/PKIA/DTL/DLGAP5/KIF14/CDC7/TRIP13/MAD2L1/E2F8/TUBG1/CDK1/CENPE/KNTC1/TUBA4A/NEK2/DONSON/AURKA/E2F7/MAD1L1/TOPBP1/PCNA/PSMD14/CDK6/CARM1/ESPL1/NBN/PLK1/BID/CDKN2C/PSMA7/CDC6/CDCA5/UBE2E2
regulation of mitotic sister chromatid separation	15	1.33416e-10	3.20495e-08	UBE2C/CCNB1/BUB1B/NDC80/TTK/PTTG1/DLGAP5/TRIP13/MAD2L1/TACC3/CENPE/MAD1L1/ESPL1/PLK1/CDC6
mitotic sister chromatid separation	15	2.35706e-10	5.36418e-08	UBE2C/CCNB1/BUB1B/NDC80/TTK/PTTG1/DLGAP5/TRIP13/MAD2L1/TACC3/CENPE/MAD1L1/ESPL1/PLK1/CDC6
spindle organization	26	3.57028e-10	7.71894e-08	KIF2A/PRC1/TPX2/CCNB1/KIF11/RACGAP1/NUF2/NDC80/TTK/CDC20/KIF4A/TUBG1/TACC3/CENPE/BIRC5/NEK2/AURKA/PSRC1/STIL/MAP9/BORA/ESPL1/ASPM/PLK1/FBXO5/KIF23
regulation of chromosome separation	15	4.05898e-10	8.35763e-08	UBE2C/CCNB1/BUB1B/NDC80/TTK/PTTG1/DLGAP5/TRIP13/MAD2L1/TACC3/CENPE/MAD1L1/ESPL1/PLK1/CDC6
metaphase/anaphase transition of mitotic cell cycle	14	6.59049e-10	1.29533e-07	UBE2C/CCNB1/BUB1B/NDC80/TTK/DLGAP5/TRIP13/MAD2L1/TACC3/CENPE/MAD1L1/ESPL1/PLK1/CDC6
metaphase/anaphase transition of cell cycle	14	8.74799e-10	1.64462e-07	UBE2C/CCNB1/BUB1B/NDC80/TTK/DLGAP5/TRIP13/MAD2L1/TACC3/CENPE/MAD1L1/ESPL1/PLK1/CDC6
regulation of mitotic sister chromatid segregation	15	2.28453e-09	4.11596e-07	UBE2C/CCNB1/BUB1B/NDC80/TTK/PTTG1/DLGAP5/TRIP13/MAD2L1/TACC3/CENPE/MAD1L1/ESPL1/PLK1/CDC6
regulation of mitotic metaphase/anaphase transition	13	3.24846e-09	5.61853e-07	UBE2C/CCNB1/BUB1B/NDC80/TTK/DLGAP5/TRIP13/MAD2L1/CENPE/MAD1L1/ESPL1/PLK1/CDC6
neutrophil chemotaxis	17	3.64522e-09	6.06228e-07	CCL20/CXCL8/LBP/CXCL6/CXCL1/S100A9/EDN1/CXCL3/S100A8/CXCL2/EDN2/S100A12/IL1B/CKLF/CCL7/CCL13/CXCR2
regulation of metaphase/anaphase transition of cell cycle	13	4.28939e-09	6.86938e-07	UBE2C/CCNB1/BUB1B/NDC80/TTK/DLGAP5/TRIP13/MAD2L1/CENPE/MAD1L1/ESPL1/PLK1/CDC6
mitotic cell cycle checkpoint	23	6.1095e-09	9.25282e-07	CCNB1/BUB1B/SFN/NDC80/ZWINT/TTK/TOP2A/TRIP13/MAD2L1/NABP1/E2F8/CDK1/KNTC1/DONSON/ZWILCH/AURKA/E2F7/MAD1L1/TOPBP1/PCNA/CARM1/NBN/PLK1
chromosome separation	16	6.20564e-09	9.25282e-07	UBE2C/CCNB1/BUB1B/NDC80/TTK/PTTG1/TOP2A/DLGAP5/TRIP13/MAD2L1/TACC3/CENPE/MAD1L1/ESPL1/PLK1/CDC6
regulation of cell division	22	1.05753e-08	1.52425e-06	MDK/PRC1/KIF20A/SFN/PTN/RACGAP1/KIF14/KIF18B/IL1B/PAX6/E2F8/CIB1/AURKA/E2F7/OSM/CDC25B/MAP9/ECT2/ASPM/PLK1/KIF23/CDC6
mitotic metaphase plate congression	12	1.20722e-08	1.68387e-06	CCNB1/NUF2/NDC80/KIF14/CENPE/PSRC1/SPDL1/MAD1L1/KIF18A/KIF2C/CDCA8/CDCA5
neutrophil migration	17	2.34238e-08	3.16514e-06	CCL20/CXCL8/LBP/CXCL6/CXCL1/S100A9/EDN1/CXCL3/S100A8/CXCL2/EDN2/S100A12/IL1B/CKLF/CCL7/CCL13/CXCR2
metaphase plate congression	13	3.13782e-08	4.1115e-06	CCNB1/NUF2/NDC80/KIF14/FAM83D/CENPE/PSRC1/SPDL1/MAD1L1/KIF18A/KIF2C/CDCA8/CDCA5
positive regulation of cell cycle process	29	4.42643e-08	5.62937e-06	EDN1/UBE2C/CCNB1/SFN/RACGAP1/NDC80/DTL/DLGAP5/KIF14/CDC7/IL1B/NUSAP1/FAM83D/MAD2L1/E2F8/CDK1/AURKA/E2F7/PCNA/CDC25B/RHNO1/CARM1/ECT2/ESPL1/KIF23/CDC6/CDCA5/FEN1/UBE2E2
granulocyte chemotaxis	17	5.78835e-08	7.15109e-06	CCL20/CXCL8/LBP/CXCL6/CXCL1/S100A9/EDN1/CXCL3/S100A8/CXCL2/EDN2/S100A12/IL1B/CKLF/CCL7/CCL13/CXCR2
G2/M transition of mitotic cell cycle	27	6.80799e-08	8.17715e-06	FHL1/TPD52L1/TPX2/CCNB1/MELK/FOXM1/HMMR/PKIA/DTL/KIF14/CDC7/TUBG1/CDK1/CCNA2/MASTL/TUBA4A/NEK2/DONSON/AURKA/TOPBP1/CDC25B/PSMD14/CDK6/BORA/NBN/PLK1/PSMA7
cell cycle G2/M phase transition	28	7.30282e-08	8.53442e-06	FHL1/TPD52L1/TPX2/CCNB1/MELK/FOXM1/HMMR/PKIA/DTL/KIF14/CDC7/TUBG1/CDK1/CCNA2/MASTL/TUBA4A/NEK2/DONSON/AURKA/TOPBP1/CDC25B/PSMD14/CDK6/BRCC3/BORA/NBN/PLK1/PSMA7
positive regulation of cell cycle	34	1.23222e-07	1.40213e-05	CKS2/EDN1/UBE2C/CCNB1/SFN/RACGAP1/EIF4EBP1/NDC80/FOSL1/DTL/DLGAP5/SPHK1/KIF14/CDC7/IL1B/NUSAP1/FAM83D/MAD2L1/E2F8/CDK1/AURKA/E2F7/PSRC1/PCNA/CDC25B/RHNO1/CARM1/ECT2/ESPL1/KIF23/CDC6/CDCA5/FEN1/UBE2E2
kinetochore organization	8	1.87699e-07	2.08105e-05	CENPK/NUF2/NDC80/CENPW/CENPA/CENPE/CENPH/SMC4
establishment of chromosome localization	14	1.94188e-07	2.09917e-05	CCNB1/NUF2/NDC80/DLGAP5/KIF14/FAM83D/CENPE/PSRC1/SPDL1/MAD1L1/KIF18A/KIF2C/CDCA8/CDCA5
chromosome localization	14	2.29587e-07	2.4213e-05	CCNB1/NUF2/NDC80/DLGAP5/KIF14/FAM83D/CENPE/PSRC1/SPDL1/MAD1L1/KIF18A/KIF2C/CDCA8/CDCA5
meiotic cell cycle process	22	3.06591e-07	3.1087e-05	CKS2/RAD54B/BUB1B/NUF2/TTK/PTTG1/TOP2A/C11orf80/CDC20/TRIP13/CCNA1/MYBL1/TUBG1/MASTL/AURKA/KIF18A/CDC25B/SMC4/ESPL1/ASPM/PLK1/FBXO5
meiotic nuclear division	21	3.09144e-07	3.1087e-05	CKS2/RAD54B/BUB1B/NUF2/TTK/PTTG1/TOP2A/C11orf80/CDC20/TRIP13/CCNA1/MYBL1/MASTL/AURKA/KIF18A/CDC25B/SMC4/ESPL1/ASPM/PLK1/FBXO5
granulocyte migration	17	3.75051e-07	3.68572e-05	CCL20/CXCL8/LBP/CXCL6/CXCL1/S100A9/EDN1/CXCL3/S100A8/CXCL2/EDN2/S100A12/IL1B/CKLF/CCL7/CCL13/CXCR2
positive regulation of mitotic cell cycle	19	4.31256e-07	4.14389e-05	EDN1/UBE2C/CCNB1/EIF4EBP1/NDC80/DTL/DLGAP5/SPHK1/CDC7/IL1B/NUSAP1/MAD2L1/CDK1/AURKA/CDC25B/ESPL1/CDC6/CDCA5/UBE2E2
negative regulation of sister chromatid segregation	10	4.9531e-07	4.65592e-05	CCNB1/BUB1B/NDC80/TTK/PTTG1/TRIP13/MAD2L1/MAD1L1/ESPL1/PLK1
cell cycle G1/S phase transition	28	5.79182e-07	5.31038e-05	RRM2/FHL1/CCNB1/BCAT1/EZH2/SFN/EIF4EBP1/DBF4/CDKN3/KIF14/CDC7/CCNA1/FAM83D/MCM2/E2F8/CDK1/CCNA2/AURKA/E2F7/PCNA/CDK6/CARM1/BID/FBXO5/CDKN2C/MCM5/CDC6/UBE2E2
neutrophil activation	39	5.89496e-07	5.31038e-05	CXCL8/CXCL6/CXCL1/PTX3/QPCT/PLAU/S100A9/FABP5/GGH/CLEC5A/PLAUR/S100A8/FCGR3B/CD44/FCN1/S100A12/GPR84/RNASE2/TCIRG1/CR1/JUP/QSOX1/MCEMP1/AMPD3/RAB27A/ALOX5/PRDX4/GLB1/RAP2C/PSMD14/HK3/S100A11/GLA/TICAM2/CXCR2/IDH1/FPR2/GCA/TRAPPC1
negative regulation of chromosome segregation	10	6.35873e-07	5.60708e-05	CCNB1/BUB1B/NDC80/TTK/PTTG1/TRIP13/MAD2L1/MAD1L1/ESPL1/PLK1
negative regulation of cell cycle process	31	6.59605e-07	5.60708e-05	RRM2/FHL1/CCNB1/BUB1B/EZH2/SFN/NDC80/TTK/PTTG1/DTL/CDC7/TRIP13/MAD2L1/E2F8/CDK1/BCL6/NEK2/DONSON/AURKA/E2F7/MAD1L1/TOPBP1/PCNA/PSMD14/BRCC3/CARM1/ESPL1/NBN/PLK1/FBXO5/PSMA7
meiotic cell cycle	25	6.61335e-07	5.60708e-05	CKS2/RAD54B/BUB1B/NUF2/TTK/PTTG1/TOP2A/C11orf80/CDC20/TRIP13/CCNA1/MYBL1/TUBG1/CDK1/MASTL/NEK2/AURKA/KIF18A/CDC25B/SMC4/ESPL1/NBN/ASPM/PLK1/FBXO5
DNA integrity checkpoint	20	8.09064e-07	6.72767e-05	CCNB1/FBXO6/SFN/TOP2A/DTL/E2F8/CDK1/DONSON/AURKA/E2F7/TOPBP1/PCNA/DNA2/BRCC3/RHNO1/CARM1/NBN/PLK1/ATR/CDC6
attachment of spindle microtubules to kinetochore	9	8.33729e-07	6.80197e-05	CCNB1/RACGAP1/NUF2/NDC80/CENPE/NEK2/MAD1L1/KIF2C/ECT2
negative regulation of mitotic cell cycle	29	8.90686e-07	7.13209e-05	FHL1/CCNB1/BUB1B/EZH2/SFN/NDC80/ZWINT/TTK/PTTG1/TOP2A/TRIP13/MAD2L1/NABP1/E2F8/CDK1/KNTC1/BCL6/DONSON/ZWILCH/AURKA/E2F7/MAD1L1/TOPBP1/PCNA/PSMD14/CARM1/NBN/PLK1/PSMA7
cytokinesis	20	1.07159e-06	8.42465e-05	ANLN/CEP55/PRC1/KIF20A/RACGAP1/RND3/CENPA/KIF4A/KIF14/NUSAP1/E2F8/AURKA/E2F7/CDC25B/MAP9/ECT2/ESPL1/PLK1/KIF23/CDC6
spindle checkpoint	9	1.10089e-06	8.50043e-05	CCNB1/BUB1B/NDC80/TTK/TRIP13/MAD2L1/SPDL1/MAD1L1/PLK1
negative regulation of mitotic sister chromatid separation	9	1.43887e-06	0.000109152	CCNB1/BUB1B/NDC80/TTK/PTTG1/TRIP13/MAD2L1/MAD1L1/PLK1
regulation of chromosome organization	28	1.66294e-06	0.000121659	UBE2C/CCNB1/UHRF1/BUB1B/NDC80/TTK/PTTG1/TOP2A/DLGAP5/IL1B/TRIP13/MAD2L1/TACC3/CENPE/ATAD2/BCL6/NEK2/MKI67/MAD1L1/DNMT1/ESPL1/NBN/RMI2/PLK1/ATR/CDC6/CDCA5/FEN1
G1/S transition of mitotic cell cycle	26	1.68567e-06	0.000121659	RRM2/FHL1/CCNB1/BCAT1/EZH2/SFN/EIF4EBP1/DBF4/CDKN3/KIF14/CDC7/CCNA1/MCM2/E2F8/CDK1/AURKA/E2F7/PCNA/CDK6/CARM1/BID/FBXO5/CDKN2C/MCM5/CDC6/UBE2E2
neutrophil mediated immunity	38	1.70619e-06	0.000121659	CXCL6/CXCL1/PTX3/QPCT/PLAU/S100A9/FABP5/GGH/CLEC5A/PLAUR/S100A8/FCGR3B/CD44/FCN1/S100A12/GPR84/RNASE2/TCIRG1/CR1/JUP/QSOX1/MCEMP1/AMPD3/RAB27A/ALOX5/PRDX4/GLB1/RAP2C/PSMD14/HK3/S100A11/GLA/TICAM2/CXCR2/IDH1/FPR2/GCA/TRAPPC1
mitotic cytokinesis	12	1.71628e-06	0.000121659	ANLN/CEP55/KIF20A/RACGAP1/CENPA/KIF4A/NUSAP1/MAP9/ECT2/ESPL1/PLK1/KIF23
negative regulation of chromosome separation	9	1.86272e-06	0.000129909	CCNB1/BUB1B/NDC80/TTK/PTTG1/TRIP13/MAD2L1/MAD1L1/PLK1
DNA replication	27	1.98511e-06	0.000136248	RRM2/GINS1/DBF4/DTL/CDC7/ALYREF/RFC4/MCM2/E2F8/CDK1/BCL6/IGF1R/GMNN/DONSON/E2F7/TOPBP1/PCNA/DNA2/RHNO1/S100A11/NBN/RMI2/ATR/RNASEH2A/MCM5/CDC6/FEN1
signal transduction in response to DNA damage	17	2.05303e-06	0.000138708	PMAIP1/CCNB1/SFN/FOXM1/CD44/DTL/E2F8/CDK1/AURKA/E2F7/PCNA/BRCC3/CARM1/NBN/PLK1/ATR/BID
neutrophil degranulation	37	2.14101e-06	0.000142426	CXCL1/PTX3/QPCT/PLAU/S100A9/FABP5/GGH/CLEC5A/PLAUR/S100A8/FCGR3B/CD44/FCN1/S100A12/GPR84/RNASE2/TCIRG1/CR1/JUP/QSOX1/MCEMP1/AMPD3/RAB27A/ALOX5/PRDX4/GLB1/RAP2C/PSMD14/HK3/S100A11/GLA/TICAM2/CXCR2/IDH1/FPR2/GCA/TRAPPC1
regulation of DNA replication	16	2.35483e-06	0.000154277	DBF4/CDC7/RFC4/E2F8/CDK1/BCL6/IGF1R/GMNN/DONSON/E2F7/PCNA/DNA2/S100A11/NBN/ATR/CDC6
neutrophil activation involved in immune response	37	2.47314e-06	0.00015961	CXCL1/PTX3/QPCT/PLAU/S100A9/FABP5/GGH/CLEC5A/PLAUR/S100A8/FCGR3B/CD44/FCN1/S100A12/GPR84/RNASE2/TCIRG1/CR1/JUP/QSOX1/MCEMP1/AMPD3/RAB27A/ALOX5/PRDX4/GLB1/RAP2C/PSMD14/HK3/S100A11/GLA/TICAM2/CXCR2/IDH1/FPR2/GCA/TRAPPC1
DNA-dependent DNA replication	18	2.57205e-06	0.000163552	GINS1/CDC7/ALYREF/RFC4/MCM2/E2F8/BCL6/GMNN/DONSON/E2F7/TOPBP1/PCNA/DNA2/NBN/RNASEH2A/MCM5/CDC6/FEN1
establishment of organelle localization	35	2.62521e-06	0.000164513	SYBU/IL13RA2/FOLR1/SYT13/UCHL1/CCNB1/NUF2/PFN2/NDC80/CENPA/DLGAP5/KIF14/PAX6/NUSAP1/FAM83D/BICD1/CENPE/ADORA2B/COL7A1/RAB27A/SEC24D/SEC24A/PSRC1/SPDL1/MAD1L1/KIF18A/VAMP2/KIF2C/ESPL1/CDK5/CDCA8/KIF23/CDCA5/TRAPPC1/YKT6
regulation of cytokinesis	13	2.684e-06	0.000165795	PRC1/KIF20A/RACGAP1/KIF14/E2F8/AURKA/E2F7/CDC25B/MAP9/ECT2/PLK1/KIF23/CDC6
regulation of cell cycle G2/M phase transition	22	2.97125e-06	0.000180954	FHL1/TPX2/CCNB1/HMMR/PKIA/DTL/KIF14/CDC7/TUBG1/CDK1/TUBA4A/NEK2/DONSON/AURKA/TOPBP1/CDC25B/PSMD14/CDK6/BRCC3/NBN/PLK1/PSMA7
negative regulation of mitotic sister chromatid segregation	9	3.04062e-06	0.000182606	CCNB1/BUB1B/NDC80/TTK/PTTG1/TRIP13/MAD2L1/MAD1L1/PLK1
cell cycle DNA replication	11	3.65687e-06	0.000216607	GINS1/CDC7/RFC4/E2F8/BCL6/GMNN/DONSON/E2F7/PCNA/DNA2/FEN1
positive regulation of neutrophil chemotaxis	8	4.15021e-06	0.000242507	CXCL8/LBP/CXCL6/CXCL1/EDN1/CXCL3/CXCL2/CXCR2
negative regulation of cell cycle phase transition	24	4.57663e-06	0.000263858	FHL1/CCNB1/BUB1B/EZH2/SFN/NDC80/TTK/DTL/TRIP13/MAD2L1/E2F8/CDK1/DONSON/AURKA/E2F7/MAD1L1/TOPBP1/PCNA/PSMD14/BRCC3/CARM1/NBN/PLK1/PSMA7
mitotic spindle assembly checkpoint	8	5.43295e-06	0.000301181	CCNB1/BUB1B/NDC80/TTK/TRIP13/MAD2L1/MAD1L1/PLK1
spindle assembly checkpoint	8	5.43295e-06	0.000301181	CCNB1/BUB1B/NDC80/TTK/TRIP13/MAD2L1/MAD1L1/PLK1
mitotic spindle checkpoint	8	5.43295e-06	0.000301181	CCNB1/BUB1B/NDC80/TTK/TRIP13/MAD2L1/MAD1L1/PLK1
myeloid leukocyte migration	19	6.5202e-06	0.000356878	CCL20/CXCL8/LBP/CXCL6/CXCL1/S100A9/EDN1/CXCL3/S100A8/CXCL2/EDN2/S100A12/IL1B/CKLF/TNFRSF11A/CCL7/CCL13/CXCR2/FPR2
negative regulation of mitotic metaphase/anaphase transition	8	7.03576e-06	0.000375588	CCNB1/BUB1B/NDC80/TTK/TRIP13/MAD2L1/MAD1L1/PLK1
positive regulation of granulocyte chemotaxis	8	7.03576e-06	0.000375588	CXCL8/LBP/CXCL6/CXCL1/EDN1/CXCL3/CXCL2/CXCR2
glycosyl compound metabolic process	17	8.81255e-06	0.000464337	KLB/MOCOS/UPP1/MACROD2/NT5E/TK1/CTPS1/TYMP/NT5C3A/APOBEC3A/NME1/AMPD3/PRPS2/ATIC/CASK/GLA/RHOQ
negative regulation of metaphase/anaphase transition of cell cycle	8	9.02041e-06	0.000464337	CCNB1/BUB1B/NDC80/TTK/TRIP13/MAD2L1/MAD1L1/PLK1
positive regulation of neutrophil migration	8	9.02041e-06	0.000464337	CXCL8/LBP/CXCL6/CXCL1/EDN1/CXCL3/CXCL2/CXCR2
regulation of G2/M transition of mitotic cell cycle	20	9.42124e-06	0.000479264	FHL1/TPX2/CCNB1/HMMR/PKIA/DTL/KIF14/CDC7/TUBG1/CDK1/TUBA4A/NEK2/DONSON/AURKA/TOPBP1/PSMD14/CDK6/NBN/PLK1/PSMA7
mitotic spindle assembly	11	1.11251e-05	0.00055936	KIF2A/TPX2/KIF11/RACGAP1/CDC20/KIF4A/BIRC5/NEK2/MAP9/PLK1/KIF23
chromosome condensation	8	1.14572e-05	0.000569436	CCNB1/TOP2A/NCAPG/NUSAP1/CDK1/NCAPG2/SMC4/CDCA5
anaphase-promoting complex-dependent catabolic process	12	1.16676e-05	0.000573303	UBE2C/CCNB1/BUB1B/UBE2S/PTTG1/CDC20/MAD2L1/CDK1/AURKA/PSMD14/PLK1/PSMA7
spindle assembly	15	1.19629e-05	0.000581209	KIF2A/TPX2/KIF11/RACGAP1/CDC20/KIF4A/TUBG1/BIRC5/NEK2/AURKA/MAP9/ASPM/PLK1/FBXO5/KIF23
negative regulation of mitotic cell cycle phase transition	22	1.24175e-05	0.000596594	FHL1/CCNB1/BUB1B/EZH2/SFN/NDC80/TTK/TRIP13/MAD2L1/E2F8/CDK1/DONSON/AURKA/E2F7/MAD1L1/TOPBP1/PCNA/PSMD14/CARM1/NBN/PLK1/PSMA7
cytoskeleton-dependent cytokinesis	12	1.32919e-05	0.000631585	ANLN/CEP55/KIF20A/RACGAP1/CENPA/KIF4A/NUSAP1/MAP9/ECT2/ESPL1/PLK1/KIF23
DNA conformation change	25	1.42737e-05	0.000670712	RAD54B/CCNB1/CENPK/GINS1/CENPW/TOP2A/CENPA/NCAPG/NUSAP1/HMGB3/MCM2/CDK1/HJURP/NCAPG2/CENPH/OIP5/RECQL/DNA2/SMC4/NBN/ASF1B/MCM5/CDCA5/CENPM/CHD1L
regulation of neutrophil chemotaxis	8	1.44256e-05	0.000670712	CXCL8/LBP/CXCL6/CXCL1/EDN1/CXCL3/CXCL2/CXCR2
chemokine-mediated signaling pathway	12	1.51104e-05	0.000693076	CCL20/CXCL8/CXCL6/CXCL1/EDN1/CXCL3/CXCL2/CIB1/CCL7/ACKR4/CCL13/CXCR2
release of cytochrome c from mitochondria	10	1.52271e-05	0.000693076	MLLT11/BCL2A1/HGF/PMAIP1/PLAUR/SFN/PPIF/BID/BIK/PRELID1
nucleoside metabolic process	15	1.60808e-05	0.000724308	MOCOS/UPP1/MACROD2/NT5E/TK1/CTPS1/TYMP/NT5C3A/APOBEC3A/NME1/AMPD3/PRPS2/ATIC/CASK/RHOQ
negative regulation of nuclear division	10	1.78621e-05	0.000794865	CCNB1/BUB1B/NDC80/TTK/PTTG1/TRIP13/MAD2L1/MAD1L1/PLK1/FBXO5
response to ischemia	8	1.8015e-05	0.000794865	GJB2/CAV1/UCHL1/HK2/PPIF/CIB1/HYOU1/PANX1
DNA strand elongation	7	2.06321e-05	0.000901145	GINS1/RFC4/PCNA/DNA2/NBN/RNASEH2A/FEN1
DNA damage checkpoint	17	2.08524e-05	0.000901658	CCNB1/FBXO6/SFN/DTL/E2F8/CDK1/DONSON/AURKA/E2F7/TOPBP1/PCNA/BRCC3/RHNO1/CARM1/NBN/PLK1/ATR
negative regulation of mitotic nuclear division	9	2.3306e-05	0.000997776	CCNB1/BUB1B/NDC80/TTK/PTTG1/TRIP13/MAD2L1/MAD1L1/PLK1
female meiotic nuclear division	7	2.67307e-05	0.00113317	TTK/TRIP13/MASTL/AURKA/CDC25B/PLK1/FBXO5
regulation of neutrophil migration	8	2.74679e-05	0.00115312	CXCL8/LBP/CXCL6/CXCL1/EDN1/CXCL3/CXCL2/CXCR2
positive regulation of cell cycle phase transition	12	2.78463e-05	0.00115776	UBE2C/CCNB1/DTL/DLGAP5/CDC7/FAM83D/CDK1/CDC25B/ESPL1/CDC6/CDCA5/UBE2E2
DNA strand elongation involved in DNA replication	6	3.29954e-05	0.00134596	GINS1/RFC4/PCNA/DNA2/RNASEH2A/FEN1
regulation of ubiquitin protein ligase activity	6	3.29954e-05	0.00134596	UBE2C/UBE2S/CDC20/MAD2L1/PLK1/FBXO5
response to gonadotropin	7	3.42389e-05	0.00138363	GJB2/WT1/EFNA5/ITGA3/ICAM1/CCNA2/POR
positive regulation of response to external stimulus	24	3.46653e-05	0.0013879	F3/CXCL8/LBP/CXCL6/CXCL1/LY96/S100A9/EDN1/CXCL3/S100A8/CXCL2/EDN2/S100A12/IL1B/OSMR/ADORA2B/TNFSF4/TNFRSF11A/RIPK2/MAPK13/OSM/CCL7/CXCR2/FPR2
signal transduction by p53 class mediator	23	3.7933e-05	0.00150479	ZNF385B/PMAIP1/TPX2/CCNB1/SFN/FOXM1/CD44/RFC4/E2F8/CDK1/AURKA/E2F7/TOPBP1/PCNA/DNA2/RHNO1/CARM1/NBN/RMI2/CDK5/ATR/PHLDA3/TP53BP2
nuclear DNA replication	9	3.87115e-05	0.00152171	GINS1/CDC7/RFC4/BCL6/GMNN/DONSON/PCNA/DNA2/FEN1
meiotic spindle organization	5	3.9877e-05	0.00152591	TUBG1/AURKA/ESPL1/ASPM/FBXO5
attachment of mitotic spindle microtubules to kinetochore	5	3.9877e-05	0.00152591	NUF2/NDC80/CENPE/MAD1L1/KIF2C
positive regulation of ubiquitin protein ligase activity	5	3.9877e-05	0.00152591	UBE2C/UBE2S/CDC20/PLK1/FBXO5
leukocyte chemotaxis	19	4.24504e-05	0.00161014	CCL20/CXCL8/LBP/CXCL6/CXCL1/S100A9/EDN1/CXCL3/S100A8/CXCL2/EDN2/S100A12/IL1B/CKLF/TNFRSF11A/CCL7/CCL13/CXCR2/FPR2
protein localization to chromosome	11	4.85139e-05	0.00179294	BUB1B/EZH2/NDC80/TTK/CENPA/CDK1/SPDL1/CARM1/PLK1/ATR/CDCA5
signal transduction involved in DNA integrity checkpoint	11	4.85139e-05	0.00179294	CCNB1/SFN/DTL/E2F8/CDK1/AURKA/E2F7/PCNA/BRCC3/CARM1/PLK1
signal transduction involved in DNA damage checkpoint	11	4.85139e-05	0.00179294	CCNB1/SFN/DTL/E2F8/CDK1/AURKA/E2F7/PCNA/BRCC3/CARM1/PLK1
signal transduction involved in cell cycle checkpoint	11	5.47085e-05	0.00200474	CCNB1/SFN/DTL/E2F8/CDK1/AURKA/E2F7/PCNA/BRCC3/CARM1/PLK1
negative regulation of chromosome organization	14	5.54135e-05	0.00201351	CCNB1/BUB1B/NDC80/TTK/PTTG1/TOP2A/TRIP13/MAD2L1/ATAD2/MAD1L1/DNMT1/ESPL1/NBN/PLK1
protein localization to chromosome, centromeric region	6	6.00347e-05	0.00216325	BUB1B/NDC80/TTK/CENPA/CDK1/SPDL1
regulation of peptidase activity	31	6.83683e-05	0.00243267	TFPI2/F3/WFDC5/SERPINA6/HGF/CSTA/S100A9/PMAIP1/CAV1/PLAUR/S100A8/SFN/CRIM1/PTTG1/CD44/PI3/CR1/PI15/CASP3/C4A/CD109/COL7A1/BIRC5/RIPK2/POR/CASP4/PSMD14/DNAJB6/MICAL1/BID/PRELID1
DNA damage response, signal transduction by p53 class mediator	13	6.86369e-05	0.00243267	PMAIP1/CCNB1/SFN/FOXM1/CD44/E2F8/CDK1/AURKA/E2F7/PCNA/CARM1/NBN/ATR
retrograde vesicle-mediated transport, Golgi to ER	11	8.6756e-05	0.00304986	KIF2A/KIF11/RACGAP1/KIF4A/KDELR3/CENPE/KIF18A/KIF2C/KIF15/RAB6B/KIF23
regulation of release of cytochrome c from mitochondria	8	9.87959e-05	0.00344511	MLLT11/HGF/PMAIP1/PLAUR/PPIF/BID/BIK/PRELID1
intrinsic apoptotic signaling pathway	23	0.000101274	0.00350325	MLLT11/BCL2A1/ZNF385B/S100A9/PMAIP1/TRIB3/CAV1/PLAUR/S100A8/SFN/MELK/CD44/PPIF/CASP3/HSPH1/HYOU1/P4HB/CASP4/TMEM117/NBN/BID/PHLDA3/TP53BP2
establishment of mitotic spindle localization	6	0.000102369	0.00351304	NDC80/CENPA/PAX6/NUSAP1/SPDL1/ESPL1
regulation of endopeptidase activity	29	0.000123798	0.0042102	TFPI2/F3/WFDC5/SERPINA6/HGF/CSTA/S100A9/PMAIP1/PLAUR/S100A8/SFN/CRIM1/PTTG1/CD44/PI3/CR1/CASP3/C4A/CD109/COL7A1/BIRC5/RIPK2/POR/CASP4/PSMD14/DNAJB6/MICAL1/BID/PRELID1
kinetochore assembly	5	0.000124631	0.0042102	CENPK/CENPW/CENPA/CENPE/CENPH
meiosis I	13	0.000129863	0.00435292	CKS2/RAD54B/PTTG1/TOP2A/C11orf80/TRIP13/CCNA1/MYBL1/AURKA/CDC25B/ESPL1/PLK1/FBXO5
positive regulation of leukocyte chemotaxis	11	0.000133645	0.00444523	CXCL8/LBP/CXCL6/CXCL1/EDN1/CXCL3/CXCL2/EDN2/CCL7/CXCR2/FPR2
regulation of granulocyte chemotaxis	8	0.000136008	0.00447091	CXCL8/LBP/CXCL6/CXCL1/EDN1/CXCL3/CXCL2/CXCR2
positive regulation of mitotic cell cycle phase transition	10	0.000136485	0.00447091	UBE2C/CCNB1/DTL/DLGAP5/CDC7/CDK1/ESPL1/CDC6/CDCA5/UBE2E2
meiosis I cell cycle process	13	0.000154298	0.00501641	CKS2/RAD54B/PTTG1/TOP2A/C11orf80/TRIP13/CCNA1/MYBL1/AURKA/CDC25B/ESPL1/PLK1/FBXO5
pyrimidine nucleoside metabolic process	8	0.000158548	0.00511613	UPP1/NT5E/TK1/CTPS1/TYMP/NT5C3A/APOBEC3A/NME1
regulation of DNA-dependent DNA replication	8	0.000184075	0.00589584	CDC7/RFC4/E2F8/BCL6/GMNN/DONSON/E2F7/NBN
positive regulation of leukocyte migration	13	0.000215217	0.00684263	CCL20/CXCL8/LBP/CXCL6/CXCL1/EDN1/CXCL3/ICAM1/CXCL2/EDN2/CCL7/CXCR2/FPR2
protein localization to kinetochore	5	0.000231423	0.0072933	BUB1B/NDC80/TTK/CDK1/SPDL1
regulation of G1/S transition of mitotic cell cycle	16	0.000232765	0.0072933	FHL1/CCNB1/EZH2/SFN/KIF14/E2F8/CDK1/AURKA/E2F7/PCNA/CDK6/CARM1/BID/CDKN2C/CDC6/UBE2E2
regulation of cell cycle G1/S phase transition	17	0.000234797	0.00730405	FHL1/CCNB1/EZH2/SFN/KIF14/FAM83D/E2F8/CDK1/AURKA/E2F7/PCNA/CDK6/CARM1/BID/CDKN2C/CDC6/UBE2E2
apoptotic mitochondrial changes	13	0.000252719	0.00777143	MLLT11/BCL2A1/HGF/PMAIP1/PLAUR/HK2/SFN/PPIF/MPV17L/BID/BIK/PRELID1/TP53BP2
G2 DNA damage checkpoint	7	0.000253416	0.00777143	DTL/CDK1/DONSON/TOPBP1/BRCC3/NBN/PLK1
positive regulation of mitotic nuclear division	8	0.000281619	0.00857551	EDN1/UBE2C/DLGAP5/IL1B/NUSAP1/AURKA/ESPL1/CDCA5
spindle localization	7	0.000298526	0.00902677	NDC80/CENPA/PAX6/NUSAP1/SPDL1/ESPL1/ASPM
cell chemotaxis	21	0.000303633	0.00911744	CCL20/CXCL8/LBP/CXCL6/CXCL1/HGF/S100A9/EDN1/CXCL3/S100A8/CXCL2/EDN2/S100A12/IL1B/CKLF/TNFRSF11A/CCL7/CCL13/PLXNB3/CXCR2/FPR2
regulation of transcription involved in G1/S transition of mitotic cell cycle	6	0.000313945	0.00929793	RRM2/CCNA1/E2F7/PCNA/FBXO5/CDC6
positive regulation of release of cytochrome c from mitochondria	6	0.000313945	0.00929793	MLLT11/PMAIP1/PLAUR/PPIF/BID/BIK
DNA replication-independent nucleosome assembly	8	0.000322232	0.00936909	CENPK/CENPW/CENPA/HJURP/CENPH/OIP5/ASF1B/CENPM
centromere complex assembly	8	0.000322232	0.00936909	CENPK/CENPW/CENPA/CENPE/HJURP/CENPH/OIP5/CENPM
response to interleukin-18	4	0.000322848	0.00936909	CLDN1/ALOX5/RIPK2/TICAM2

## Sheet: KEGG of ccRCC-related module
KEGG of ccRCC-related module
Description	Gene Count	pvalue	BH-corrected pvalue	geneID(entrezid)
Cell cycle	24	2.82351e-11	7.84936e-09	891/701/2810/7272/9232/10926/991/8317/8900/4085/4171/983/890/8379/5111/994/1021/9700/5347/545/1031/4174/990/1875
IL-17 signaling pathway	15	1.89744e-06	0.000263744	6364/4312/3576/6372/2919/6280/2921/6279/8061/2920/3553/836/7184/5603/6354
p53 signaling pathway	12	1.45632e-05	0.00134952	6241/55240/5366/891/2810/92344/836/983/1021/545/637/3732
NF-kappa B signaling pathway	13	0.000119435	0.00830076	3576/3929/2919/597/23643/5328/2921/3383/2920/3553/8792/6357/353376
DNA replication	7	0.000346081	0.0192421	5984/4171/5111/1763/10535/4174/2237
Rheumatoid arthritis	11	0.000756759	0.0350632	6364/4312/3576/6372/2919/2921/3383/2920/3553/10312/8792
Progesterone-mediated oocyte maturation	11	0.00127859	0.0429081	891/8900/4085/983/890/3480/5603/6790/8379/994/5347
Pyrimidine metabolism	8	0.00129799	0.0429081	6241/7378/4907/7083/1503/1890/51251/4830
Viral protein interaction with cytokine and cytokine receptor	11	0.00138911	0.0429081	6364/3576/6372/2919/2921/2920/3559/6354/51554/6357/3579

## Sheet: Details of top-10 GO.BP terms
Details of top-10 GO.BP terms
mitotic nuclear division	A mitotic cell cycle process comprising the steps by which the nucleus of a eukaryotic cell divides; the process involves condensation of chromosomal DNA into a highly compacted form. Canonically, mitosis produces two daughter nuclei whose chromosome complement is identical to that of the mother cell.
sister chromatid segregation	The cell cycle process in which sister chromatids are organized and then physically separated and apportioned to two or more sets.
nuclear division	The division of a cell nucleus into two nuclei, with DNA and other nuclear contents distributed between the daughter nuclei.
chromosome segregation	The process in which genetic material, in the form of chromosomes, is organized into specific structures and then physically separated and apportioned to two or more sets. In eukaryotes, chromosome segregation begins with the condensation of chromosomes, includes chromosome separation, and ends when chromosomes have completed movement to the spindle poles. less
mitotic sister chromatid segregation	The cell cycle process in which replicated homologous chromosomes are organized and then physically more...
organelle fission	The creation of two or more organelles by division of one organelle.
nuclear chromosome segregation	The process in which genetic material, in the form of nuclear chromosomes, is organized into specifi more...
microtubule cytoskeleton organization involved in mitosis	Any microtubule cytoskeleton organization that is involved in mitosis.
regulation of mitotic nuclear division	Any process that modulates the frequency, rate or extent of mitosis.
regulation of chromosome segregation	Any process that modulates the frequency, rate or extent of chromosome segregation, the process in which genetic material, in the form of chromosomes, is organized and then physically separated and apportioned to two or more sets. less

## Sheet: Details of all KEGG terms
Details of all KEGG terms
Cell cycle	Mitotic cell cycle progression is accomplished through a reproducible sequence of events, DNA replication (S phase) and mitosis (M phase) separated temporally by gaps known as G1 and G2 phases. Cyclin-dependent kinases (CDKs) are key regulatory enzymes, each consisting of a catalytic CDK subunit and an activating cyclin subunit. CDKs regulate the cell's progression through the phases of the cell …
IL-17 signaling pathway	The interleukin 17 (IL-17) family, a subset of cytokines consisting of IL-17A-F, plays crucial roles in both acute and chronic inflammatory responses. IL-17A, the hallmark cytokine of the newly defined T helper 17 (TH17) cell subset, has important roles in protecting the host against extracellular pathogens, but also promotes inflammatory pathology in autoimmune disease, whereas IL-17F is mainly …
p53 signaling pathway	p53 activation is induced by a number of stress signals, including DNA damage, oxidative stress and activated oncogenes. The p53 protein is employed as a transcriptional activator of p53-regulated genes. This results in three major outputs; cell cycle arrest, cellular senescence or apoptosis. Other p53-regulated gene functions communicate with adjacent cells, repair the damaged DNA or set up posi…
NF-kappa B signaling pathway	Nuclear factor-kappa B (NF-kappa B) is the generic name of a family of transcription factors that function as dimers and regulate genes involved in immunity, inflammation and cell survival. There are several pathways leading to NF-kappa B-activation. The canonical pathway is induced by tumour necrosis factor-alpha (TNF-alpha), interleukin-1 (IL-1) or byproducts of bacterial and viral infections. …
DNA replication	A complex network of interacting proteins and enzymes is required for DNA replication. Generally, DNA replication follows a multistep enzymatic pathway. At the DNA replication fork, a DNA helicase (DnaB or MCM complex) precedes the DNA synthetic machinery and unwinds the duplex parental DNA in cooperation with the SSB or RPA. On the leading strand, replication occurs continuously in a 5 to 3 dire…
Rheumatoid arthritis	Rheumatoid arthritis (RA) is a chronic autoimmune joint disease where persistent inflammation affects bone remodeling leading to progressive bone destruction. In RA, abnormal activation of the immune system elevates pro-inflammatory cytokines and chemokines levels, which can promote synovial angiogenesis and leukocyte infiltration. The synovium forms a hyperplastic pannus with infiltrated macroph…
Progesterone-mediated oocyte maturation	Xenopus oocytes are naturally arrested at G2 of meiosis I. Exposure to either insulin/IGF-1 or the steroid hormone progesterone breaks this arrest and induces resumption of the two meiotic division cycles and maturation of the oocyte into a mature, fertilizable egg. This process is termed oocyte maturation. The transition is accompanied by an increase in maturation promoting factor (MPF or Cdc2/c…
Pyrimidine metabolism	Missing.
Viral protein interaction with cytokine and cytokine receptor	Viruses have evolved diverse mechanisms to evade detection and destruction by the immune system, including copying and repurposing host cytokine and cytokine receptor genes. Viral cytokines and cytokine receptors, together with a group of structurally unique, soluble, cytokine-binding or cytokine receptor-binding proteins, represent the three major molecular strategies for subversion and modulati…
