# Supplementary material for: Identification of KIF18B as a Hub Candidate Gene in the Metastasis of Clear Cell Renal Cell Carcinoma by Weighted Gene Co-expression Network Analysis
Source: Front Genet. 2020 Aug 20;11:905. doi: 10.3389/fgene.2020.00905 (PMC7468490; doi:10.3389/fgene.2020.00905)
Supplement: Supplementary file 5 [file Table_5.XLSX]

## Sheet: age
χ2 squared test of clinical traits and expression leve of KIF18B
1. χ2 squared test of age and expression leve of KIF18B
	>65	≤65
low-expression group	82	142
high-expression group	72	161
χ2 = 1.4186
df = 1
p-value = 0.2336

## Sheet: gender
χ2 squared test of clinical traits and expression leve of KIF18B
2. χ2 squared test of gender and expression leve of KIF18B
	female	male
low-expression group	79	145
high-expression group	74	159
χ2 = 0.4834
df = 1
p-value = 0.4869

## Sheet: tumor grade
χ2 squared test of clinical traits and expression leve of KIF18B
3. χ2 squared test of tumor grade and expression leve of KIF18B
	G1	G2	G3	G4
low-expression group	5	113	91	15
high-expression group	2	85	96	50
χ2 = 24.057
df = 3
p-value = 2.43E-05

## Sheet:  pathological stage
χ2 squared test of clinical traits and expression leve of KIF18B
4. χ2 squared test of pathological stage and expression leve of KIF18B
	Stage I	Stage II	Stage III	Stage IV
low-expression group	132	26	46	20
high-expression group	93	21	63	56
χ2 = 26.829
df = 3
p-value = 6.394E-06

## Sheet: T stage
χ2 squared test of clinical traits and expression leve of KIF18B
5. χ2 squared test of T stage and expression leve of KIF18B
	T1	T2	T3	T4
low-expression group	136	32	55	1
high-expression group	95	26	104	8
χ2 = 28.277
df = 3
p-value = 3.178E-06

## Sheet: distant metastasis
χ2 squared test of clinical traits and expression leve of KIF18B
6. χ2 squared test of distant metastasis and expression leve of KIF18B
	M1	M0
low-expression group	205	19
high-expression group	178	55
χ2 = 18.149
df = 1
p-value = 2.043E-05
